# Identification and quantification of human relaxin proteins by immunoaffinity-mass spectrometry

Yasmine Rais<sup>1</sup> and Andrei P. Drabovich<sup>1\*</sup>

<sup>1</sup> Division of Analytical and Environmental Toxicology, Department of Laboratory Medicine and Pathology, Faculty of Medicine and Dentistry, University of Alberta, Edmonton, Alberta, Canada

## ABSTRACT

The human relaxins belong to the Insulin/IGF/Relaxin superfamily of peptide hormones, and their physiological function is primarily associated with reproduction. In this study, we focused on a prostate tissue-specific relaxin RLN1 (REL1\_HUMAN protein), and a broader tissue specificity RLN2 (REL2\_HUMAN). Due to their structural similarity, REL1 and REL2 proteins were collectively named a ‘human relaxin protein’ in previous studies and were exclusively measured by immunoassays. We hypothesized that the highly selective and sensitive immunoaffinity-selected reaction monitoring (IA-SRM) assays could reveal the identity and concentration of REL1 and REL2 in biological samples and facilitate evaluation of these proteins for diagnostic applications. RT-PCR revealed the high levels of RLN1 and RLN2 transcripts in prostate and breast cancer cell lines. However, no endogenous prorelaxin-1 or mature REL1 were detected by IA-SRM in numerous biological samples. IA-SRM assay of REL2 revealed its undetectable levels (<9 pg/mL) in control female and male sera, relatively high levels of REL2 in maternal sera (median 331 pg/mL, 120 patients), and a biphasic expression of REL2 across the gestational weeks. IA-SRM assays discovered potential cross-reactivity and false-positive measurements for relaxin immunoassays. The developed IA-SRM assays will facilitate investigation of physiological and pathological roles of REL1 and REL2 peptide hormones.

**KEYWORDS:** RLN1, RLN2, REL1\_HUMAN, REL2\_HUMAN, relaxin H1, relaxin H2, immunoaffinity, mass spectrometry, prostate, maternal serum, enzyme-linked immunosorbent assay

## INTRODUCTION

The human relaxin genes belong to the Insulin/Insulin-like growth factor/Relaxin superfamily of ten peptide hormones that share high structural similarity despite relatively low sequence homology. These peptides include human insulin (INSL), insulin-like growth factors IGF1 and IGF2, relaxins RLN1, RLN2 and RLN3, and the insulin-like peptides INSL3, INSL4, INSL5, and INSL6<sup>1</sup>. Based on the Human Protein Atlas classification of the RNA-derived tissue specificity, several genes of the insulin/IGF/Relaxin superfamily exhibit the tissue-specific expression profiles. This includes the categories of the highly tissue-enriched RLN1 (prostate), INS (pancreas), IGF2 (placenta), INSL4 (placenta), INSL5 (intestine), a category of the group enriched RLN3 (parathyroid gland, testis), INSL3 (ovary, testis), and INSL6 (retina, testis), and a category of the tissue-enhanced RLN2 (fallopian tubes) and IGF1 (cervix). The high tissue specificity makes these genes and proteins promising biomarkers<sup>2</sup>.

We have previously evaluated a number of prostate tissue-specific proteins including KLK4, TGM4, and TMPRSS2-ERG fusion protein, but revealed their insufficient diagnostic performance<sup>3-5</sup>. Evaluation of the Human Protein Atlas for the top prostate-specific transcripts revealed REL1 (RLN1 gene) as the only secreted protein which has never been evaluated as a prostate cancer marker. The literature review revealed limited and contradictory information about REL1 measurements. Due to potential cross-reactivity of anti-REL1 and anti-REL2 antibodies and immunoassays, these two human genes and proteins were collectively referred to as a “human relaxin protein”.

Similar to insulin, prorelaxin proteins are cleaved into the mature REL1\_HUMAN and REL2\_HUMAN secreted peptides (~6 kDa), as well as the connecting C-peptides<sup>6-8</sup>. The mature relaxins share 82% homology and comprise of A and B chains connected by two interchain disulfide bonds (**Figure 1A**). Relaxin protein sequence analysis (**Figure 1B**) reveals numerous lysine and arginine residues, short tryptic peptides, and peptides with numerous post-translational modifications. Low expression levels and lack of robust proteotypic peptides make REL1 and REL2 challenging proteins for identification and quantification with the conventional proteomic approaches and may explain inconsistent information about their expression. For example, a highly prostate-tissue specific RLN1 was listed by Uniprot<sup>9</sup>, NextProt<sup>10</sup> and the Human Protein Atlas<sup>11</sup> as a gene with evidence at protein level and as a plasma secreted protein, without experimental data (detection in blood plasma by immunoassays, mass spectrometry, or proximity extension

assays) to support those observations. Likewise, Peptide Atlas<sup>12</sup> presented identifications of the signal peptide and connecting C-peptide sequences in some studies, while the tryptic peptides of the mature REL1 have never been experimentally observed.

In this study, we aimed at developing the highly selective and sensitive immunoaffinity-selected reaction monitoring (IA-SRM) assays as alternative tools to validate the human relaxin immunoassays (**Figure 1C**), reveal the identity and concentration of REL1 and REL2 in biological samples, and facilitate evaluation of these proteins for diagnostic applications.

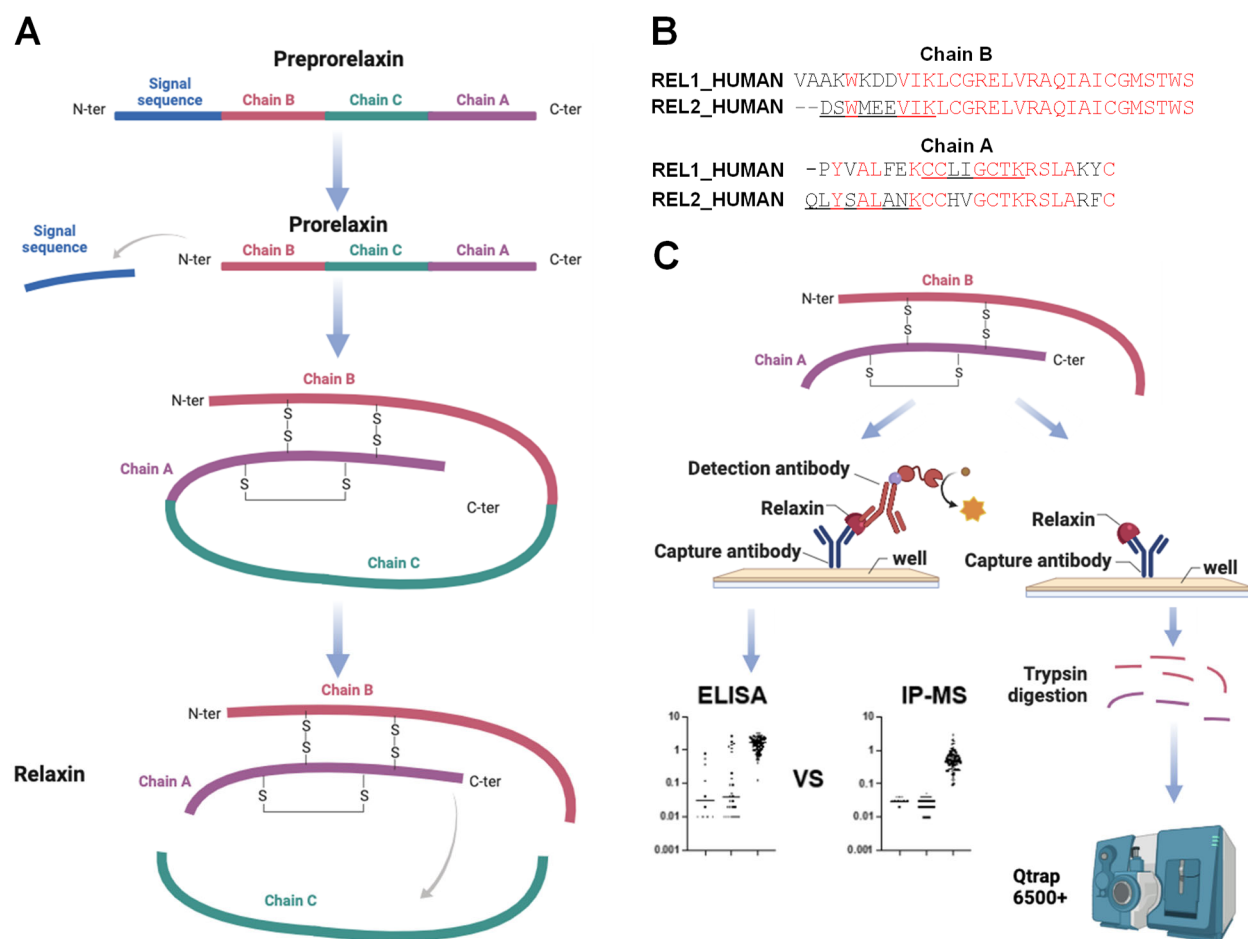

**Figure 1. Experimental workflow for quantification of the human relaxin proteins.** (A) Similar to insulin, preprorelaxin H2 (REL2\_HUMAN; P04090-1) is translated as a 185 amino acid peptide whose signal peptide facilitates translocation into the endoplasmic reticulum (ER) and is proteolytically removed. ER-mediated oxidative folding forms disulfide bonds, and trans-Golgi processing removes the connecting C-peptide to generate a mature form of REL2 with chains B (29 aa) and A (24 aa). (B) Alignment of REL1 and REL2 chains B and A reveals their high sequence similarity. (C) Either recombinant or endogenous relaxin proteins were enriched from serum or biological samples using the identical capture antibody coated onto 96-well microplates. One of the microplates was utilized for ELISA immunoassay measurements, while another microplate was subjected to proteomic samples preparation, trypsin digestion of relaxin-antibody complexes to release prototypic peptides, and identification and quantification of tryptic peptides by nanoflow liquid chromatography – mass spectrometry.

## EXPERIMENTAL PROCEDURES

**Chemicals, reagents, and samples.** Dithiothreitol, iodoacetamide, and trifluoroacetic acid (TFA) were purchased from Thermo Fisher Scientific (Burlington, ON, Canada). Mass spectrometry-grade acetonitrile (ACN) and water were obtained from Fisher Scientific (Fair Lawn, NJ). Formic acid (FA), dimethyl sulfoxide (DMSO), and dimethylated SOLu-trypsin were obtained from Sigma-Aldrich (Oakville, ON). Stable SpikeTides\_L peptides were obtained from JPT Peptide Technologies (Germany). The use of archived deidentified serum and seminal plasma samples was approved by the Health Research Ethics Board of Alberta (#HREBA.CC-22-0056) and the University of Alberta (#Pro00104098).

**Clinical samples.** Leftover deidentified healthy female and male samples were obtained from the Alberta Health Services, and the use of these samples for our research study was approved by the Health Research Ethics Board of Alberta (HREBA.CC-22-0056). Leftover healthy normal maternal serum samples were previously collected for the study by Chan *et al*<sup>13</sup> and approved for research study by the University of Alberta's Health Research Ethics Board. Briefly, maternal sera were selected from an archive of samples from women who elected to undergo second trimester (15–16 weeks) prenatal “triple screens” for trisomy 18, Down's Syndrome, and open spina bifida. All women were  $\geq 18$  years of age and delivered at  $\geq 22$  weeks of gestation to live singletons without malformations<sup>13</sup>. The use of these archived samples for our study has been approved by the Health Research Ethics Board of Alberta (#HREBA.CC-22-0056). Seminal plasma samples were obtained from the APCaRI Biorepository (<https://apcari.ca>) and their use was approved by the Health Research Ethics Board of Alberta (#HREBA.CC-14-0085 and HREBA.CC-22-0056).

**Cell culture.** Cell lines were obtained from ATCC (<https://www.atcc.org>). Cell lines were cultured in a humidified incubator at 37 °C and 5% CO<sub>2</sub> in T25 flasks to ~80% confluency. A prostate cancer LNCaP cell line was cultured in RPMI 1640 medium (Gibco) media supplemented with 10% fetal bovine serum (Invitrogen) and 1% penicillin-streptomycin (Invitrogen). The breast cancer cell lines MDA-MB-231 and MCF-7 were cultured in Dulbecco's modified Eagle's medium (HyClone DMEM) supplemented with 10% v/v fetal bovine serum, 5% non-essential amino acids, 50 units/ml penicillin, and 50 µg/ml streptomycin. All cells were washed three times with phosphate-buffered saline (PBS), and snap-frozen at -20 °C until further analysis.

**Cell lysis.** Cell pellets were exposed to 20 µl of EDTA-free protease inhibitor cocktail (Roche) to prevent protein degradation, lysed with 50 µl of 0.1% RapiGest SF (Waters), vortexed and probe sonicated at 20 kHz for 1 minute. Lysates were centrifugated at 16,000g and 4 °C for 10 min to

remove cell debris. Total protein content in the lysates was determined using the Pierce BCA protein assay kit (Fisher Scientific).

**Cell line secretome.** LNCaP cells growing in a serum-free medium were serum-deprived for 48 h. Conditioned medium (supernatant) with cell line secretome was collected and stored at -20 °C. Supernatant (5 ml) was added to the 0.5-1 kDa molecular cut-off membrane (Spectrum Laboratories) and dialyzed in 1 mM ammonium bicarbonate with two buffer exchanges for 24 hours at 4° C. Dialyzed supernatant was concentrated 10-fold to 0.5 mL using a Speed Vacuum Concentrator.

**Centrifugal ultrafiltration of sera.** Pooled maternal sera (500 µL) was diluted 10-fold with 10% ACN. The mixture of serum and ACN was placed on ice for 1 hour and then centrifuged at 5,000 rpm for 5 minutes. The supernatant was fractionated using a prepared low-protein binding Vivaspin-2 20K MWCO membrane filter at 4,000 g until 95% of the input serum had passed through the 20K (cellulose triacetate) filter. The concentrate and filtrate were subjected to immunoaffinity enrichment and Q-Exactive analysis.

**ELISA.** Human REL1 DuoSet ELISA (DY3257) and Human REL2 DuoSet ELISA (DY2804-05) assays were purchased from R&D systems. The quantification of recombinant REL1 and recombinant REL2 was performed following the manufacturer's protocol.

**SDS-PAGE.** SDS-PAGE was performed using a BioRad Mini-Cell electrophoresis unit utilizing Mini-PROTEAN TGX Precast Gels (4–15% gradient acrylamide). The PageRule Protein (250 to 5 KDa) was used as a ladder. Under non-reducing conditions, Tris/Glycine/SDS buffer (#1610732EDU) was used as the buffer system at a constant voltage of 120 V for 80 min.

**RT-PCR.** Total RNA was extracted from LNCaP, Hela and MCF-7 cells using TRIzol (Thermo Fisher Scientific). RNA was reversely transcribed to cDNA via iScript™ Reverse Transcription Supermix (Bio-Rad Laboratories). After quantification by NanoVue Plus spectrophotometer (GE Healthcare), 500 ng cDNA was utilized as a template for amplification of RLN1 and RLN2 using Hot Start Taq 2X Master Mix (New England Biolabs) and GeneAmp PCR System 2700 thermal cycler (Applied Biosystems). The forward and reverse PCR primers for RLN1 gene included 5'-CCTGTTCTTGTTCCACCTGC-3' and 5'-AGCTCTGGTAATGATGGTTGC-3' (Integrated DNA Technologies) and RLN2 primers were 5'-CGGACTCATGGATGGAGGAA-3' (forward) and 5'-GTAGCTGTGGTAATGCTGGCC-3' (reverse). The final volume was 25 µl, and an initial denaturation step of 95 °C for 5 min was followed by 35 cycles of 95 °C for 30 seconds 53 °C for 30 s and 72 °C for 30 seconds, and one cycle at 72 °C for 5 min. RLN1 and RLN2 cDNA were detected by 2% agarose gel electrophoresis.

**Immunoaffinity enrichment and proteomic sample preparation.** Anti-REL1 rat monoclonal antibody (part # 843350), and anti-REL2 mouse monoclonal antibody (part # 844036) from the ELISA kits (R&D system) were used as capture antibodies for the enrichment of REL1 and REL2 proteins from cell lysate and clinical samples. 500 ng of each antibody was coated onto high-binding 96-well polystyrene microplates (#07000128; Greiner Bio-One) at 100  $\mu$ l per well and incubated overnight at room temperature (RT). Following three washes with 0.1% Tween 20 in PBS (washing buffer; 200  $\mu$ l each), the plate was blocked for 1 hour at RT with 200  $\mu$ l of blocking buffer (1% BSA in wash buffer). After repeated washing, 100  $\mu$ g of total cell lysate protein per well or 50  $\mu$ l of clinical samples (blood serum and seminal plasma) were diluted with 50  $\mu$ l of the dilution buffer (0.1% BSA in wash buffer, 0.2  $\mu$ m-filtered) and added to microplates. Following a 2-hour incubation with shaking, the plate was washed three times with 200  $\mu$ l of washing buffer and three times with 50 mM ammonium bicarbonate. The enriched proteins underwent reduction with dithiothreitol, alkylation with iodoacetamide, and digestion on the same plate using trypsin (0.5  $\mu$ g/well). SpikeTides\_L (**supplementary Table S1**) peptide standards (200 fmol/well) were added after digestion. Tryptic peptides were desalted and concentrated with C18 microextraction tips (Agilent).

**Development of SRM assays.** Peptide Atlas<sup>12</sup>, neXtProt<sup>10</sup> and our shotgun MS data were used to select proteotypic peptides for REL1 and REL2 proteins, including chain A and B tryptic peptides, as well as connecting chain C peptides representing immature relaxin forms. In total, 17 synthetic heavy isotope-labeled SpikeTides\_L peptides were used as internal standards for the SRM assay development (**supplementary Table S1**). Charge states and collision energies were determined based on the SRM peak area, and peptides with poor performance were excluded. Light and heavy transitions of low-intensity and with interferences were eliminated upon analysis of recombinant relaxin. As a result, six unique REL1 and REL2 peptides with the three most intense and reproducible transitions per peptide light or heavy form were scheduled within a 2-minute acquisition window (**supplementary Tables S2, S3**). A scan time of 10 ms provided at least 20 points per peak. The correct identification of peptides was confirmed by examining the superposition of light and heavy transition peaks, peak shapes, and the order of y-ion transition intensities. The amounts of the endogenous light peptides were calculated using the peak area ratio of the spiked-in heavy peptide internal standards.

**Chromatography and targeted mass spectrometry.** A quadrupole ion-trap mass spectrometer (SCIEX QTRAP 6500+) coupled to optiFlow Turbo V nanospray ion source and Eksigent Ekspert nanoLC 425 (SCIEX) was used for SRM assays. The tryptic peptides were loaded at 5  $\mu$ l/min onto

a C18 nano trap RP-1 column (Phenomenex, 10×0.075 mm, 5 μm) and separated with BioZen columns (Phenomenex Peptide Polar-C18, 150×0.075 mm, 2.6 μm, 100 Å) and 40 min gradients (300 nL/min). The gradient started with 5% buffer B and ramped to 50% buffer B over 11 min, then to 90% buffer B within 2 min, and continued for 2 min, then to 5% buffer B in 1 min and continued for 24 min. Nanospray ion source and QTRAP 6500+ parameters included 3,100 V nanospray, 150°C heater temperature, 9 psi for gas 1 (N<sub>2</sub>), 0 psi gas 2; 30 psi curtain gas (N<sub>2</sub>), and 80 V declustering potential. Q-Exactive Hybrid Quadrupole-Orbitrap (Thermo Scientific) coupled to Easy-Spray source and EASY-nLC 1000 (Thermo Scientific) was used for analysis of seminal plasma samples. The mobile phase consisted of 0.1% formic acid in water (buffer A) and 0.1% formic acid in acetonitrile (buffer B). Acclaim PepMap 100 nanoViper C18 (Thermo Scientific, 100 μm×2 cm, 5 μm, 100 Å) was used as a trap column, while EASY-Spray C18 (Thermo Scientific, 15 cm×75 μm, 3 μm) was used as an analytical column. An 18-min gradient (400 nL/min) started with 0% buffer B and ramped to 50% buffer B over 15 min, then to 100% buffer B within 1 min, and continued for 2 min. PRM scans were performed at 17.5 K resolution with 27% normalized collision energy. Automatic Gain Control target value was set to 3×10<sup>6</sup> (100 ms injection time; 2.0 m/z isolation width). The performance of the nanoLC-MS systems was assessed every six runs with BSA digest solution (10 μl of 10 fmol/μl).

**Shotgun mass spectrometry.** REL1 proteotypic peptides were identified with nanoflow liquid chromatography-tandem mass spectrometry (LC-MS/MS) and an Orbitrap Elite mass spectrometer equipped with Easy-Spray source and EASY-nLC II system (Thermo Scientific). Peptides were separated at 300 nL/min with a 2-hour gradient: 95% buffer A (0.1% formic acid in water) and 5% buffer B (0.1% formic acid in ACN) for 5 min, 5-35% B for 95 min, 35-65% B for 10 min, 65-100% B for 1 min and 100% B for 9 min. The analysis included profile MS1 scans (400–1250 m/z; 60 K resolution), followed by top 20 ion trap MS/MS scans, acquired at 33% normalized collision energy. FTMS ion count was set to 1×10<sup>6</sup> with an injection time of 200 ms, while MS/MS scans were set to 9,000 counts and 100 ms injection time. MS/MS acquisition settings included 500 minimum signal threshold, 2 m/z isolation width, 10 ms activation time, and 60 s dynamic exclusion. Monoisotopic precursor selection was enabled, and +1 and unknown charge states were rejected. Instrument parameters included 230°C capillary temperature and 2.0 kV spray voltage. Raw files were searched using MaxQuant v1.6.3.4 against the reviewed Uniprot database. Modifications considered constant cysteine carbamidomethylation and variable methionine oxidation, N-terminal acetylation, N and Q deamidation, N-term pyro-cmC, and pyro-Glu.

## RESULTS

### Development of SRM assays for quantification of REL1 and REL2 proteins

Due to their short sequence and numerous lysine and arginine residues, REL1\_HUMAN and REL2\_HUMAN proteins have only a few trypsin-cleavable proteotypic peptides. To select the best proteotypic peptides, we digested by trypsin the recombinant REL1 and REL2 and identified their peptides by shotgun mass spectrometry (nanoLC-nanoESI-MS/MS). Likewise, we obtained several heavy isotope-labeled synthetic peptides and analyzed them by targeted mass spectrometry (nanoLC-nanoESI-SRM). As a result, we selected proteotypic peptides for quantification of REL1 (CCLIGCTK) and REL2 (QLYSALANK and DSWMEEVIK) (**Figure 2**). We also evaluated post-translational modifications of the N-terminal cysteine (S-carbamoylmethylcysteine cyclization, or pyro-cmc, denoted as “c”) and glutamine (pyroglutamic acid, or pyro-Glu, denoted as “q”). We detected consistent formation of N-term pyro-cmc in cCLIGCTK (71.4% of total amount) and N-term pyro-Glu in qLYSALANK (21.5% of total amount) in synthetic peptides.

### Evaluation of immunoassays and development of IA-SRM assays

Colorimetric ELISA immunoassay revealed LODs of 69.6 ng/mL and 4.1 pg/ml for the recombinant mature REL1 and REL2, respectively (**Figure 3**). No substantial cross-reactivities of REL1 with an REL2 immunoassay and REL2 with an REL1 immunoassay were observed (**supplementary Fig. S1**).

To develop IA-SRM assays, we used REL1 and REL2 capture antibodies provided with the ELISA immunoassay kits. Briefly, antibodies were coated onto microplates, recombinant REL1 and REL2 proteins were enriched, digested by trypsin, and the proteotypic light endogenous peptides and heavy internal standard peptides were quantified by SRM. IA-SRM assays revealed LODs of 457 pg/mL for REL1 (CCLIGCTK peptide) and 36.5 pg/mL (qLYSALANK peptide) for REL2 (**Figure 3**). The difference in immunoassay and IA-SRM assay sensitivity could be attributed to the higher affinity of the anti-REL2 antibody and better ionization of REL2 proteotypic peptides. As an additional validation step, we confirmed that denatured recombinant REL1 could not be detected by IA-SRM or ELISA (**supplementary Fig. S2**).



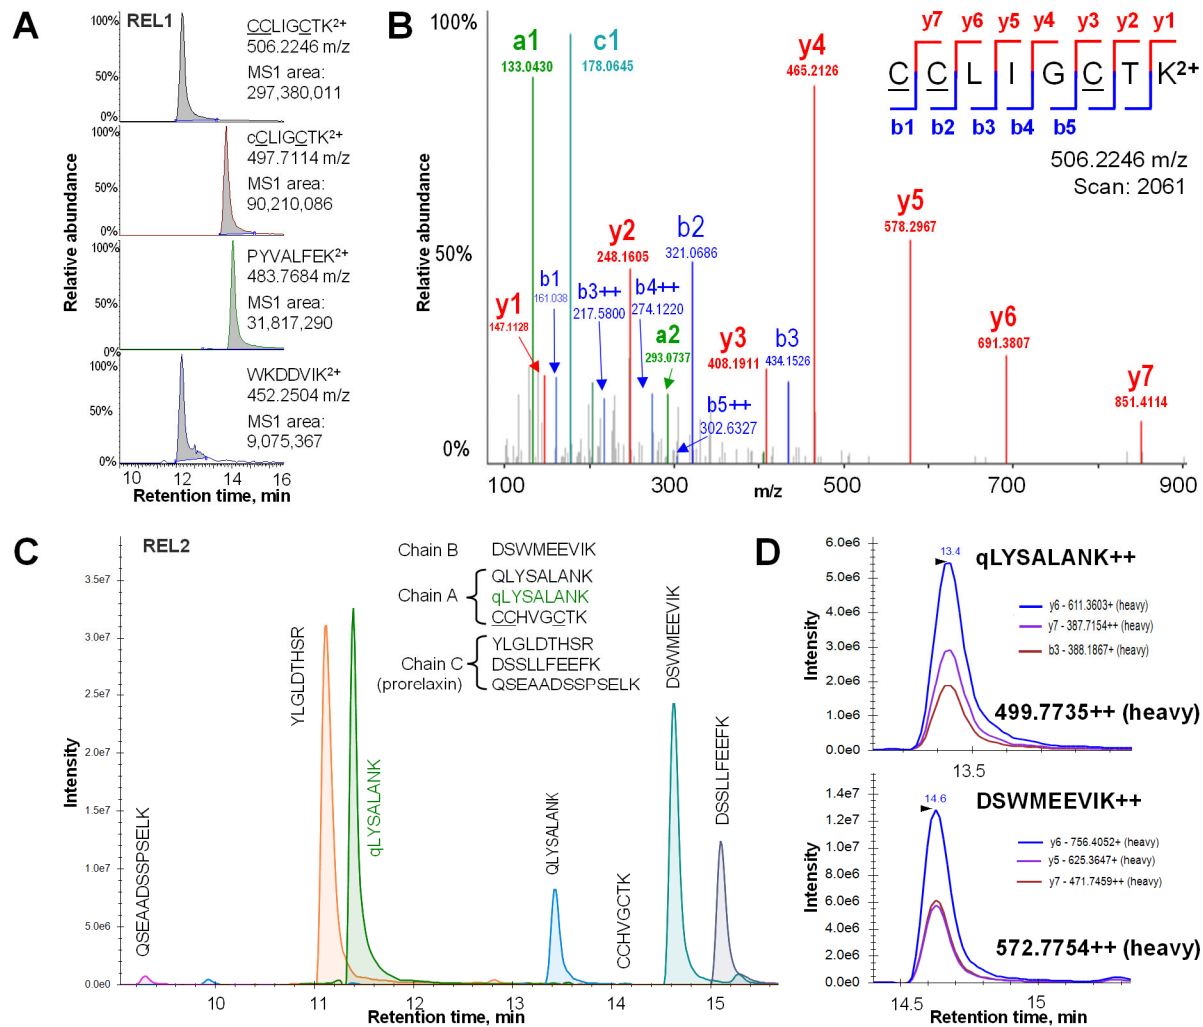

**Figure 2. Selection of proteotypic peptides for REL1 and REL2 proteins. (A)** The recombinant mature REL1 was digested by trypsin, and peptides were analyzed by nanoLC-shotgun MS/MS. CCLIGCTK peptide was selected as the most intense MS1 peptide, while MS/MS search provided fragments with the highest signal-to-noise ratio (y4, y5, and y6). **(B)** Tryptic peptides of mature REL2 and a C-peptide were selected, synthesized as heavy isotope-labeled peptides, and analyzed by nanoLC-targeted MS. DSWMEEVK and qLYSALANK peptides demonstrated the highest intensity and were selected as proteotypic peptides to quantify mature REL2. RT, retention time; C, S-carbamidomethylated cysteine; c, N-term pyro-carbamidomethylated cysteine, or pyro-cmC; q, N-term pyroglutamic acid, or pyro-Glu.

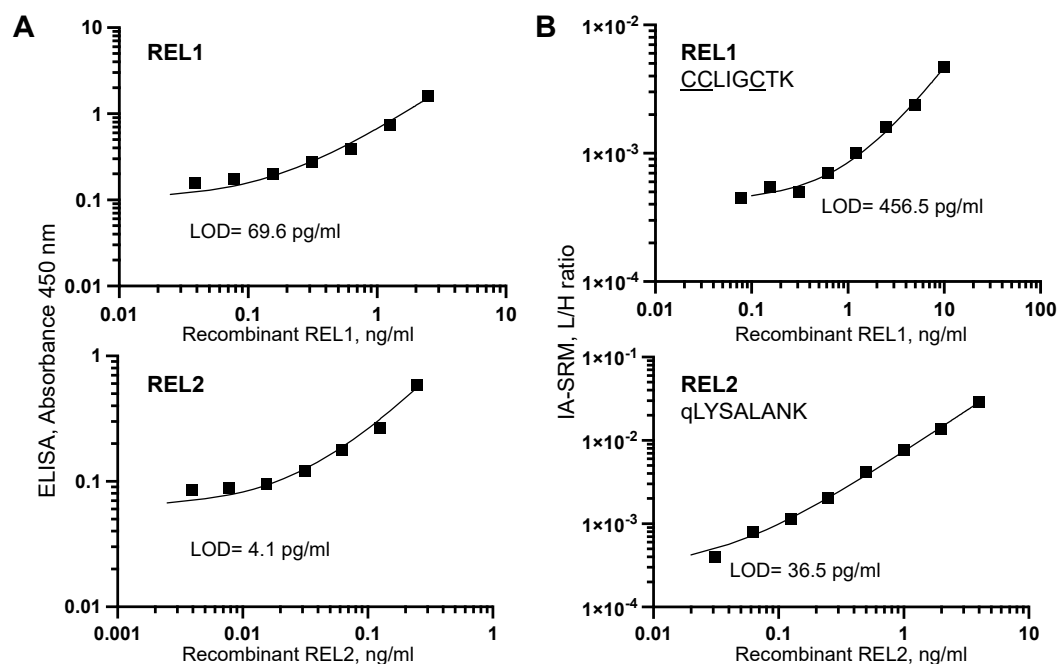

**Figure 3. Evaluation of colorimetric ELISA and IA-SRM assays to quantify the recombinant mature REL1 and REL2 proteins.** Each dilution was analyzed in triplicates by ELISA. Each analytical (full process) sample was analyzed in technical duplicates by IA-SRM. LODs were defined as the lowest concentration measured with CV<20%. Recombinant REL1 measured with ELISA and IA-SRM assays revealed LODs of 69.6 pg/mL and 456.5 pg/mL, respectively. Recombinant REL2 measured with ELISA and IA-SRM (qLYSALANK; 3 transitions) revealed LODs of 4.1 pg/mL and 36.5 pg/mL, respectively.

### Measurement of REL1 and REL2 in cell lines

The RNA sequencing data of the Cancer Cell Line Encyclopedia (the Dependency Map portal)<sup>14</sup> revealed the highest levels of RLN1 and RLN2 expression in an LNCaP prostate cancer cell line. Using RT-PCR, we experimentally confirmed the expression of RLN1 and RLN2 transcripts (**Figure 4**). The ELISA measurements revealed REL2 in LNCaP cell lysate and cell media (9.3 pg/ml and 9.1 pg/mL, respectively), but no REL1 expression (**Table 1**). To facilitate detection of REL1, LNCaP cells were grown in serum-free media, and the medium was collected, dialyzed, and partially lyophilized to decrease the volume 10-fold and concentrate proteins. However, no endogenous REL1 was detected by ELISA. Even though ‘a human relaxin’ protein has previously been associated with breast cancer<sup>15,16</sup>, we have also demonstrated that REL1 was not detectable in either MDA-MB-231 or MCF-7 breast cancer cell lines (**supplementary Table S4**).

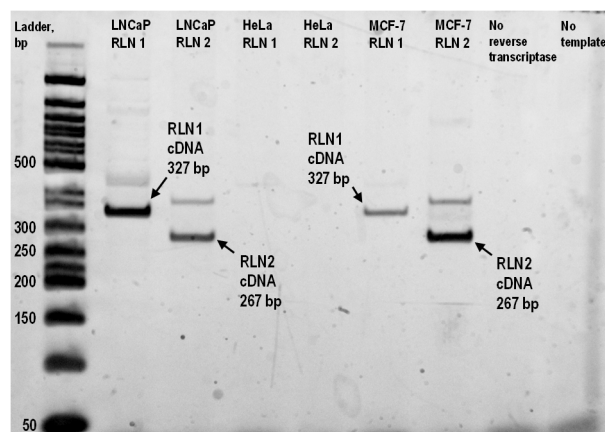

**Figure 4. Expression of RLN1 and RLN2 mRNA transcripts in cell lines.** RT-PCR revealed expression of RLN1 and RLN2 mRNA in a prostate-cancer cell line LNCaP, as confirmed by the agarose gel electrophoresis detection of cDNA products of predicted length. Cervical cancer HeLa and breast cancer MCF-7 cell lines were used as negative and positive controls, respectively, as suggested by the Cancer Cell Line Encyclopedia data.

**Table 1. Quantification of REL1 and REL2 proteins by ELISA in LNCaP cell lysate and cell culture media.** LODs of REL1 and REL2 ELISA were 69.5 and 4.1 pg/ml, respectively. Secreted prostate-specific antigen (mature KLK3\_HUMAN protein) was used as a positive control for sample treatment protocols. The samples were analyzed in duplicates.

| Sample                                      | REL1  | REL2, pg/mL | KLK3, ng/mL |
|---------------------------------------------|-------|-------------|-------------|
| LNCaP cell lysate                           | < LOD | 9.1         | 43          |
| LNCaP cell culture medium (before dialysis) | < LOD | < LOD       | 0.61        |
| LNCaP cell culture medium (after dialysis)  | < LOD | 9.3         | 1.6         |

### Measurement of REL1 and REL2 in seminal plasma

Previous studies demonstrated that the “human relaxin protein” (potentially a mixture of REL1 and REL2) was detected in prostate tissues and seminal plasma<sup>17-22</sup>. Here, we measured REL1 and REL2 by ELISA and IA-SRM in 18 seminal plasma samples and detected REL2 but not REL1 (**Figure 5**). Seminal plasma levels of REL2 (as high as ~1 ng/ml) agreed with the previous studies (1.6 ng/mL)<sup>20</sup>. IA-SRM assay independently confirmed the expression of the endogenous REL2 in several samples. Our results suggested that the endogenous ‘human relaxin’ in seminal plasma was exclusively REL2, but not REL1. Further studies with ultrasensitive immunoassays<sup>23</sup> could confirm potential REL1 expression at the levels below 70 pg/mL.

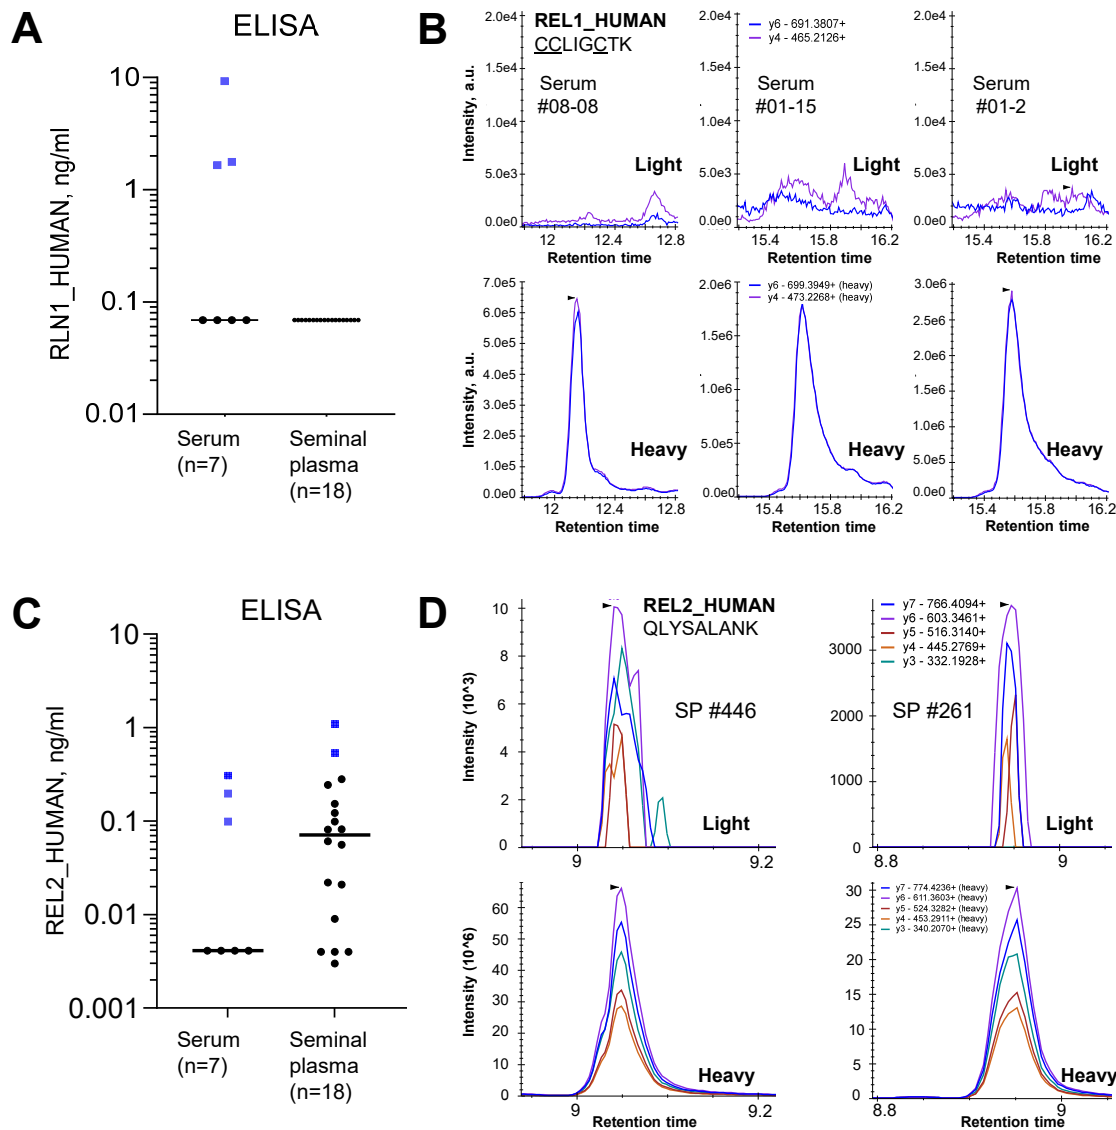

**Figure 5. Measurement of endogenous REL1 and REL2 proteins in serum and seminal plasma samples with ELISA and targeted IA-SRM assays.** Serum and seminal plasma samples positive on ELISA (blue squares) were subjected to IA-SRM measurements. **(A)** High levels of REL1 were detected with ELISA in three serum samples #08-08, #01-15, and #01-2. No REL1 protein was detected in seminal plasma. **(B)** IA-SRM measurements revealed background noise, but not any endogenous REL1 in three serum samples positive by ELISA. **(C)** Positive signal for REL2 protein was detected in serum samples #08-08, #01-15, and #01-2 by ELISA, but not IA-SRM. **(D)** REL2 ELISA-positive seminal plasma samples #446 and #261 were positive by IA-SRM.

### **Measurement of REL1 and REL2 in blood serum**

The “human relaxin protein” has previously been detected by ELISA in serum of healthy individuals and patients with prostate cancer and heart failure<sup>24-29</sup>. Here, we detected by ELISA the relatively high levels of REL1 (as high as ~7,000 pg/ml) and REL2 (as high as ~300 pg/ml) in several serum samples of healthy individuals (**Figure 5A,C**). IA-SRM measurements confirmed only REL2 in seminal plasma (**Figure 5D**). These results indicated potential cross-reactivity and false-positive identifications for REL1 and REL2 immunoassays in serum samples.

### **Evaluation of REL1 and REL2 in maternal sera**

Relatively high levels of relaxin (2.2 ng/ml) have previously been detected in maternal sera<sup>30</sup>. We hypothesized that maternal sera samples with high REL2 levels could also have measurable amounts of REL1. As a result, ELISA measurements revealed high levels of REL1 and REL2 in some maternal sera samples, while only REL2 was detected by IA-SRM (**supplementary Fig. S3**). In addition, we attempted to identify endogenous REL1 and REL2 (including their potential unexpected modifications) by shotgun LC-MS/MS. Maternal sera samples expressing high levels of REL2 were subjected to protein precipitation by ethanol and centrifugal filter purification (0.5-1 kDa cut-off) to remove high-abundance serum proteins (**supplementary Figs. S4 and S5**). Following IA enrichment and trypsin digestion, an MS1 peak of the N-term pyroGlu-modified peptide qLYSALANK of REL2 was detected in maternal sera samples at 5 ppm mass tolerance but was not selected for MS/MS fragmentation. As a positive control, we analyzed recombinant REL2 (2 ng/mL) by IA-MS/MS using Thermo Q Exactive and a more sensitive Orbitrap Fusion Lumos Tribrid instrument. Both instruments detected MS1 peak of qLYSALANK, but neither instrument selected this peptide for MS/MS fragmentation. We concluded that the endogenous levels of REL2 are too low to be identifiable by the conventional shotgun proteomic approaches even after IA enrichment. These experiments justified the use of targeted MS to detect the endogenous REL2 following IA enrichment.

### **Measurement of REL2 in maternal sera collected at different gestational weeks**

Subsequently, we measured by ELISA and IA-SRM REL2 protein in a large set of maternal sera samples collected at different gestational weeks (N=120, weeks 13-29), as well as control female (N=30) and male (N=10) sera (**supplementary Table S5**). In this experiment, the IA-SRM assay LOD (S/N>3) has been further improved to 9.4 pg/mL (relative to 36.5 pg/mL reported in **Figure 2**) through the use of a higher amount of capture antibody (500 versus 300 ng/well), two additional

calibration points (15.6 and 7.8 pg/mL), two quantifiable transitions with the lowest background ( $y6^{1+}$  and  $y7^{2+}$ ), and a sigmoidal curve fitting of a calibration curve (**supplementary Fig. S6** and **supplementary Table S6**). IA-SRM revealed a median concentration of 331 pg/mL for REL2, with concentrations ranging from 75 to 1,300 pg/mL (**Figure 6** and **supplementary Tables S7, S8**). The endogenous REL2 protein was detected only in a few female and male sera samples and at the levels approaching IA-SRM LOD (9.4 pg/mL). REL2 ELISA measurements provided median 1.6 ng/mL and revealed a reasonable correlation ( $r^2=0.94$ ) with qLYSALANK peptide IA-SRM levels (**supplementary Fig. S7** and **supplementary Table S9**). In addition, ELISA detected high concentrations of REL2 in some female and male samples (**Figure 6C** and **supplementary Table S10**). Evaluation of REL2 across gestational weeks revealed potential biphasic trend with a local minimum at 20 weeks (**Figure 6B, D** and **supplementary Table S11**).

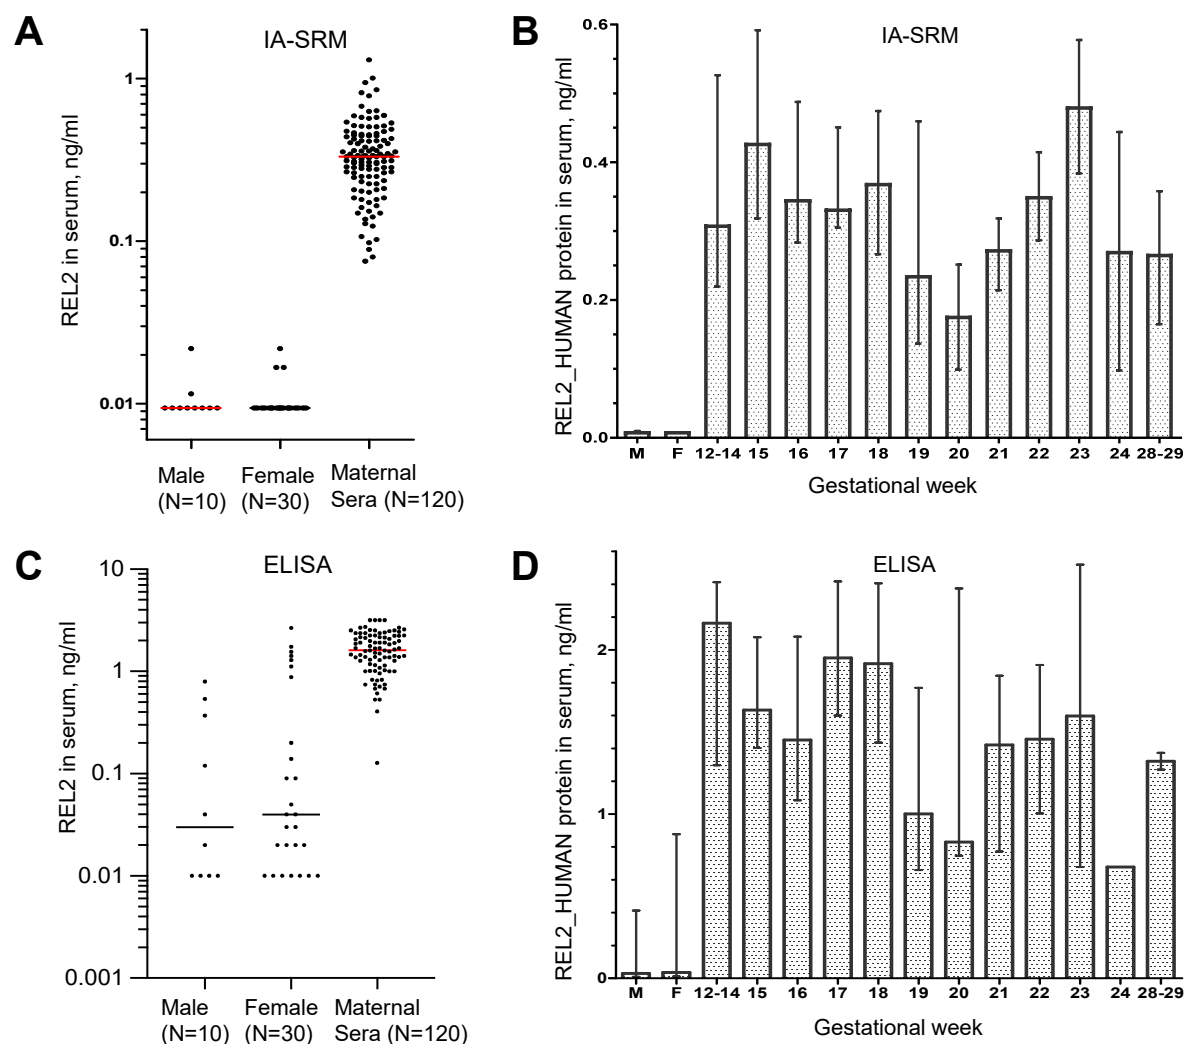

**Figure 6. Measurement of endogenous REL2 protein in maternal sera samples. (A)** Maternal sera

(n=120) and control male (n=10) and female (n=30) serum samples were measured by IA-SRM with peptide qLYSALANK and two transitions ( $y6^{1+}$  and  $y7^{2+}$ ). A calibration curve was generated with the serial dilutions of recombinant mature REL2, light-to-heavy ratio for qLYSALANK and a sigmoidal curve fitting (**supplementary Fig. S6**). LOD ( $S/N > 3$ ) was determined at 9.4 pg/mL. As a result, endogenous REL2 in maternal sera was found at a median concentration of 331 pg/ml (IQR, 247– 444 pg/ml). A statistically significant difference between the three groups of samples was detected (Kruskal-Wallis test  $P=0.00001$ ). **(B)** As measured by ELISA, endogenous REL2 was found at a median concentration of 1.6 ng/ml (IQR, 1.16 – 2.23 ng/ml). A statistically significant difference between the three groups of samples was detected (Kruskal-Wallis test  $P=0.000001$ ). **(C, D)** Variability of median REL2 levels across gestational weeks, as measured by IA-SRM and ELISA, respectively. Error bars represent IQRs.

## DISCUSSION

Ten protein members of Insulin/IGF/Relaxin superfamily share structural similarities with insulin, including two short chains and a proteolytically-cleaved C-peptide<sup>31</sup>. Due to the distinct physiological roles as potent peptide hormones and high tissue specificity<sup>1</sup>, Insulin/IGF/Relaxin proteins warrant detailed investigation of their physiological roles and evaluation of disease biomarkers.

Due to immunoassay cross-reactivity and uncertainty about expression of low-abundance REL1\_HUMAN and REL2\_HUMAN proteins in human tissues and proximal fluids, the products of these two distinct human genes RLN1 and RLN2 were often collectively named a ‘human relaxin’ protein. Numerous studies previously investigated a ‘human relaxin protein’ and identified its role as a female and male reproductive hormone, a neuropeptide within the central nervous system, vasodilator, and cardiac stimulant in the cardiovascular system, and antifibrotic agent<sup>32-34</sup>.

Expression of RLN1 gene was observed by RT-PCR in human prostate tissues and LNCaP prostate cancer cell line.<sup>35-37</sup> According to the Human Protein Atlas, RLN1 transcript was classified as an exclusive prostate-specific transcript among the top 12 genes with highly enriched expression in prostate tissues, alongside KLK3, KLK4, and ACP3 genes. RLN1 was classified as an exclusive prostate-specific transcript, and the corresponding protein was suggested as an essential factor of male fertility<sup>18,38</sup> and prostate growth<sup>27</sup>, and a prostate cancer biomarker<sup>26,27,39</sup>. A collective ‘human relaxin’ protein has been found in prostate and seminal fluid at concentrations of 8-50 ng/ml<sup>17,18,26,40</sup>.

REL2 protein was predominantly expressed by the corpus luteum<sup>31,41</sup>, and was extensively studied as a pregnancy hormone<sup>8</sup>, with the levels exclusively measured by immunoassays. REL2 plays a crucial role in preparing the birth canal for parturition<sup>31,42</sup>, and is elevated in the first trimester<sup>30,43</sup> reaching its peak concentrations of 2.2 ng/ml<sup>30,41</sup>. Similar to alpha-fetoprotein, levels of REL2 in the subsequent second trimester decreases to 1-1.3 ng/ml<sup>30,44,45</sup>. Low levels of REL2 during pregnancy have been associated with recurrent miscarriage<sup>41</sup>, toxemia of pregnancy, spontaneous abortion, ectopic pregnancy, and premature labor<sup>44-46</sup>. Those observations suggested that serum REL2 levels could serve as a potential marker of pregnancy complications, such as preeclampsia<sup>47</sup>.

RLN3 gene, another member of the relaxin family, is evolutionary distinct from RLN1 and RLN2, is predominantly expressed in the brain, and is involved in stress response, memory, and appetite regulation<sup>48</sup>. REL3 protein has been detected at levels ranging from 69 pg/mL<sup>49</sup> to 35,000 pg/mL<sup>48</sup>. Such a broad range justifies the need for independent interference-free assays to quantify REL3, and the presented IA-SRM assays could offer a viable solution.

Proteomics by mass spectrometry is a promising tool to identify, quantify and characterize human proteins<sup>50-52</sup>. We previously demonstrated numerous applications of shotgun and targeted mass spectrometry to identify and quantify human proteins<sup>53-63</sup>, discover protein biomarkers<sup>64-72</sup>, and investigate the functional roles of human proteins<sup>73-80</sup>. The emerging proteomic assays combining the high analytical sensitivity of immunoassays with the nearly absolute analytical selectivity of mass spectrometry<sup>81-83</sup> could resolve the issues related to the identification and quantification of structurally similar protein isoforms and proteins, including human relaxins. As independent assays, IA-SRM could detect and resolve the long-standing issues and cross-reactivities of ELISA. Analytical proteomics and the high-quality assay to measure low-abundance proteins in blood serum and proximal fluids are indispensable tools to verify and validate novel biomarkers, including presumably highly prostate tissue-specific genes such RLN1. The knowledge of the reference values and ranges of proteins in healthy population is imperative to enable identification and validation of novel disease biomarkers<sup>84-86</sup>.

In this study, we hypothesized that a highly prostate-specific protein REL1 (RLN1 gene) could emerge as a novel prostate cancer biomarker which has never been previously validated. IA-SRM and ELISA were chosen as independent assays, as we previously demonstrated for the highly prostate-specific proteins KLK4 and TGM4, and a prostate cancer-specific TMPRSS2-ERG fusion



protein<sup>3-5</sup>. Several biological samples including cancer cell lines, seminal plasma, female and male blood serum, and maternal sera samples were measured for the expression of endogenous REL1. Despite the use of numerous techniques and approaches, REL1 has not been detected by IA-SRM in any biological samples, including a few samples highly positive with immunoassay measurements. Our IA-SRM assay detected REL2 in maternal sera (up to 1.3 ng/ml), but not REL1. Despite previous association of REL2 with cancer cell migration in breast cancer, we revealed the undetectable levels of REL1 and REL2 proteins in MDA-231 and MCF-7 breast cancer cell lines<sup>15,16</sup>. The best tryptic peptide of REL1 (CCLIGCTK) revealed a substantial post-translational modification (N-term pyro-cmC)<sup>87</sup>, relatively poor signal and poor LOD in IA-SRM assay (460 pg/mL). While the endogenous REL1 could be expressed at levels below LODs of ELISA and IA-SRM, our extensive exploration of literature and recent data in proteomic databases (Peptide Atlas<sup>12</sup>, MassIVE<sup>88</sup>) may suggest that RLN1 mRNA may not be translated into a human protein<sup>89,90</sup>. Interestingly, RLN1 gene is found only in apes and humans and has emerged due to duplication of a relaxin gene into two distinct genes RLN1 and RLN2. As we previously demonstrated for a testis-specific protein TEX101<sup>50</sup>, some highly tissue-specific genes could be nonessential. The relatively recent evolution of a highly prostate-specific gene RLN1 could explain the lack of its function<sup>31</sup>.

Since REL1 protein proved to be undetectable using IA-SRM, we diverted our efforts to REL2 protein, whose levels were reliably measured by ELISA and IA-SRM in some samples, including maternal sera. We hypothesized that establishing baseline reference levels of REL2 in maternal sera and control female and male sera would facilitate further investigation of REL2 as a marker of female reproductive system diseases, including ovarian cancer.

REL2 protein has previously been detected at 3 pg/mL<sup>91</sup>, 10 pg/mL<sup>11</sup> and 46 pg/mL<sup>49</sup> in healthy sera. Our ELISA measurements revealed 1,600 pg/mL median serum REL2 levels in the second trimester, in agreement with the reported concentrations<sup>30,41,44,45</sup>. ELISA also demonstrated high levels of REL2 (~3 ng/mL) in some control female and male samples (**Figure 6**).

To quantify the endogenous mature REL2 by IA-SRM, we selected two proteotypic peptides DSWMEEVK and QLYSALANK. We discovered that the N-term glutamine of QLYSALANK peptide of the endogenous REL2 chain B was nearly completely modified (~98.6%) to pyro-glutamic acid (pyro-Glu, qLYSALANK). Interestingly, pyro-Glu modification is infamous for human immunoglobulins<sup>92,93</sup> and could arise due to *in vivo* modification by glutaminyl cyclase<sup>94</sup>

or spontaneous cyclisation during proteomic sample preparation. Peptide DSWMEEVIK revealed poor correlation with levels of QLYSALANK, qLYSALANK, DSSLLFEEFK, and QSEAADSSPSELK (**supplementary Fig. S8**), as well as ELISA, and was not considered for REL2 quantification. Peptide qLYSALANK exhibited relatively high correlation, and its measurements revealed the median serum REL2 levels of 331 pg/mL in maternal sera (**Figure 6**). Interestingly, nearly all control female and male sera, including those samples highly positive on ELISA, had REL2 levels below IA-SRM assay LOD of 9.4 pg/mL.

Relaxin has previously been suggested as a potential marker of ovarian cancer<sup>43</sup> and therapeutic target of ovarian cancer<sup>95,96</sup> and cardiovascular diseases<sup>24,34,97</sup>. Patients with serous adenocarcinoma exhibited a mean relaxin level of 78.1 pg/mL<sup>43</sup>, and such levels could be verified with our IA-SRM assay. Our findings may establish a baseline for future investigation of REL2 levels in disease and provide a robust assay for diagnostic applications.

## CONCLUSIONS

We developed IA-SRM assays for the quantification of human REL1 and REL2 proteins in numerous biological samples, including blood serum. IA-SRM revealed that ELISA measurements could result in overestimated REL1 and REL2 levels which could be explained by cross-reactivity and non-specific binding. Despite high mRNA levels in LNCaP cells and previous literature reports, the endogenous REL1 protein was undetectable. REL2 protein was quantified by IA-SRM in blood serum, and a 21.8 pg/mL cut-off level unambiguously distinguished maternal sera (median 331 pg/mL) from the control female and male sera (median at assay LOD of 9.4 pg/mL). High selectivity and sensitivity of IA-SRM will facilitate quantification of endogenous REL2 in clinical samples, paving the way to its comprehensive evaluation as a disease marker.

## Supporting Information

Supplementary Figures S1 to S8 and supplementary Tables S1 to S11 present REL2 identification in maternal sera, correlation of IA-MS assay with ELISA, and evaluation of REL1 and REL2 expression in cell lines, heavy isotope labelled peptides internal standards, and patient samples.

## AUTHOR INFORMATION

### Corresponding Author

\*Andrei P. Drabovich – Department of Laboratory Medicine and Pathology, University of Alberta, Edmonton, Canada,

Email: andrei.drabovich@ualberta.ca

## Notes

The authors declare no competing financial interest.

## ACKNOWLEDGMENT

We thank Jack Moore and Yuan Yuan for access and assistance with Q-Exactive instrument.

## ABBREVIATIONS

ELISA, Enzyme-linked immunosorbent assay; IA-MS, Immunoaffinity-mass spectrometry; IQR, interquartile range; LC, liquid chromatography; LOD, Limit of detection; ppm, parts per million; SRM, Selected reaction monitoring.

## REFERENCES

- (1) Bathgate, R. A.; Samuel, C. S.; Burazin, T. C.; Layfield, S.; Claasz, A. A. *et al.* Human relaxin gene 3 (H3) and the equivalent mouse relaxin (M3) gene. Novel members of the relaxin peptide family. *J Biol Chem* **2002**, *277*, 1148-1157, 10.1074/jbc.M107882200
- (2) Drabovich, A. P.; Saraon, P.; Jarvi, K.; Diamandis, E. P. Seminal plasma as a diagnostic fluid for male reproductive system disorders. *Nat Rev Urol* **2014**, *11*, 278-288, 10.1038/nrurol.2014.74
- (3) Fu, Z.; Rais, Y.; Bismar, T. A.; Hyndman, M. E.; Le, X. C. *et al.* Mapping Isoform Abundance and Interactome of the Endogenous TMPRSS2-ERG Fusion Protein by Orthogonal Immunoprecipitation-Mass Spectrometry Assays. *Mol Cell Proteomics* **2021**, *20*, 100075, 10.1016/j.mcpro.2021.100075
- (4) Karakosta, T. D.; Soosaipillai, A.; Diamandis, E. P.; Batruch, I.; Drabovich, A. P. Quantification of Human Kallikrein-Related Peptidases in Biological Fluids by Multiplatform Targeted Mass Spectrometry Assays. *Mol Cell Proteomics* **2016**, *15*, 2863-2876, 10.1074/mcp.M115.057695
- (5) Drabovich, A. P.; Saraon, P.; Drabovich, M.; Karakosta, T. D.; Dimitromanolakis, A. *et al.* Multi-omics biomarker pipeline reveals elevated levels of Protein-glutamine Gamma-glutamyltransferase 4 in seminal plasma of prostate cancer patients. *Mol Cell Proteomics* **2019**, *18*, 1807-1823, 10.1074/mcp.RA119.001612
- (6) Becker, G. J.; Hewitson, T. D. Relaxin and renal fibrosis. *Kidney Int* **2001**, *59*, 1184-1185, 10.1046/j.1523-1755.2001.0590031184.x
- (7) Dschietzig, T.; Bartsch, C.; Baumann, G.; Stangl, K. Relaxin-a pleiotropic hormone and its emerging role for experimental and clinical therapeutics. *Pharmacol Ther* **2006**, *112*, 38-56, 10.1016/j.pharmthera.2006.03.004

- (8) Ivell, R.; Hunt, N.; Khan-Dawood, F.; Dawood, M. Y. Expression of the human relaxin gene in the corpus luteum of the menstrual cycle and in the prostate. *Mol Cell Endocrinol* **1989**, *66*, 251-255, 10.1016/0303-7207(89)90037-3
- (9) UniProt, C. UniProt: the universal protein knowledgebase in 2021. *Nucleic Acids Res* **2021**, *49*, D480-D489, 10.1093/nar/gkaa1100
- (10) Zahn-Zabal, M.; Michel, P. A.; Gateau, A.; Nikitin, F.; Schaeffer, M. *et al.* The neXtProt knowledgebase in 2020: data, tools and usability improvements. *Nucleic Acids Res* **2020**, *48*, D328-D334, 10.1093/nar/gkz995
- (11) Sjostedt, E.; Zhong, W.; Fagerberg, L.; Karlsson, M.; Mitsios, N. *et al.* An atlas of the protein-coding genes in the human, pig, and mouse brain. *Science* **2020**, *367*, 10.1126/science.aay5947
- (12) Desiere, F.; Deutsch, E. W.; King, N. L.; Nesvizhskii, A. I.; Mallick, P. *et al.* The PeptideAtlas project. *Nucleic Acids Res* **2006**, *34*, D655-658, 10.1093/nar/gkj040
- (13) Chan, E.; Burstyn, I.; Cherry, N.; Bamforth, F.; Martin, J. W. Perfluorinated acids and hypothyroxinemia in pregnant women. *Environ Res* **2011**, *111*, 559-564, 10.1016/j.envres.2011.01.011
- (14) Ghandi, M.; Huang, F. W.; Jane-Valbuena, J.; Kryukov, G. V.; Lo, C. C. *et al.* Next-generation characterization of the Cancer Cell Line Encyclopedia. *Nature* **2019**, *569*, 503-508, 10.1038/s41586-019-1186-3
- (15) Radestock, Y.; Hoang-Vu, C.; Hombach-Klonisch, S. Relaxin reduces xenograft tumour growth of human MDA-MB-231 breast cancer cells. *Breast Cancer Res* **2008**, *10*, R71, 10.1186/bcr2136
- (16) Bigazzi, M.; Brandi, M. L.; Bani, G.; Sacchi, T. B. Relaxin influences the growth of MCF-7 breast cancer cells. Mitogenic and antimitogenic action depends on peptide concentration. *Cancer* **1992**, *70*, 639-643, 10.1002/1097-0142(19920801)70:3<639::aid-cncr2820700316>3.0.co;2-v
- (17) Essig, M.; Schoenfeld, C.; D'Eletto, R. T.; Amelar, R.; Steinetz, B. G. *et al.* Relaxin in human seminal plasma. *Ann N Y Acad Sci* **1982**, *380*, 224-230, 10.1111/j.1749-6632.1982.tb18045.x
- (18) Ivell, R.; Kotula-Balak, M.; Glynn, D.; Heng, K.; Anand-Ivell, R. Relaxin family peptides in the male reproductive system--a critical appraisal. *Mol Hum Reprod* **2011**, *17*, 71-84, 10.1093/molehr/gaq086
- (19) Weiss, G.; Goldsmith, L. T.; Schoenfeld, C.; D'Eletto, R. Partial purification of relaxin from human seminal plasma. *Am J Obstet Gynecol* **1986**, *154*, 749-755, 10.1016/0002-9378(86)90448-5
- (20) Armbruster, F. P.; Gron, H. J.; Maier, I.; Becker, S.; Bailer, S. M. *et al.* A sensitive homologous radioimmunoassay for human relaxin-2 (h-RLX-2) based on antibodies characterized by epitope mapping studies. *Eur J Med Res* **2001**, *6*, 1-9
- (21) Ivell, R.; Agoulnik, A. I.; Anand-Ivell, R. Relaxin-like peptides in male reproduction - a human perspective. *Br J Pharmacol* **2017**, *174*, 990-1001, 10.1111/bph.13689
- (22) Winslow, J. W.; Shih, A.; Bourell, J. H.; Weiss, G.; Reed, B. *et al.* Human seminal relaxin is a product of the same gene as human luteal relaxin. *Endocrinology* **1992**, *130*, 2660-2668, 10.1210/endo.130.5.1572287
- (23) Rissin, D. M.; Kan, C. W.; Campbell, T. G.; Howes, S. C.; Fournier, D. R. *et al.* Single-molecule enzyme-linked immunosorbent assay detects serum proteins at subfemtomolar concentrations. *Nat Biotechnol* **2010**, *28*, 595-599, 10.1038/nbt.1641

- (24) Chunduri, P.; Patel, S. A.; Levick, S. P. Relaxin/serelaxin for cardiac dysfunction and heart failure in hypertension. *Adv Pharmacol* **2022**, *94*, 183-211, 10.1016/bs.apha.2022.04.002
- (25) Simon, J.; Nemeth, E.; Nemes, A.; Husveth-Toth, M.; Radovits, T. *et al.* Circulating Relaxin-1 Level Is a Surrogate Marker of Myocardial Fibrosis in HFrEF. *Front Physiol* **2019**, *10*, 690, 10.3389/fphys.2019.00690
- (26) Xu, Y.; Yu, Q.; Liu, Y. Serum relaxin-2 as a novel biomarker for prostate cancer. *Br J Biomed Sci* **2018**, *75*, 145-148, 10.1080/09674845.2018.1424499
- (27) Samuel, C. S.; Tian, H.; Zhao, L.; Amento, E. P. Relaxin is a key mediator of prostate growth and male reproductive tract development. *Lab Invest* **2003**, *83*, 1055-1067, 10.1097/01.lab.0000079784.81186.b9
- (28) Silvertown, J. D.; Ng, J.; Sato, T.; Summerlee, A. J.; Medin, J. A. H2 relaxin overexpression increases in vivo prostate xenograft tumor growth and angiogenesis. *Int J Cancer* **2006**, *118*, 62-73, 10.1002/ijc.21288
- (29) Zhang, D.; Wang, Y.; Yu, S.; Niu, H.; Gong, X. *et al.* Serum relaxin levels as a novel biomarker for detection of acute myocardial infarction. *Int J Clin Exp Med* **2015**, *8*, 16937-16940
- (30) Petersen, L. K.; Vogel, I.; Agger, A. O.; Westergard, J.; Nils, M. *et al.* Variations in serum relaxin (hRLX-2) concentrations during human pregnancy. *Acta Obstet Gynecol Scand* **1995**, *74*, 251-256, 10.3109/00016349509024444
- (31) Bathgate, R. A.; Halls, M. L.; van der Westhuizen, E. T.; Callander, G. E.; Kocan, M. *et al.* Relaxin family peptides and their receptors. *Physiol Rev* **2013**, *93*, 405-480, 10.1152/physrev.00001.2012
- (32) Leo, C. H.; Jelinic, M.; Ng, H. H.; Marshall, S. A.; Novak, J. *et al.* Vascular actions of relaxin: nitric oxide and beyond. *Br J Pharmacol* **2017**, *174*, 1002-1014, 10.1111/bph.13614
- (33) Samuel, C. S.; Unemori, E. N.; Mookerjee, I.; Bathgate, R. A.; Layfield, S. L. *et al.* Relaxin modulates cardiac fibroblast proliferation, differentiation, and collagen production and reverses cardiac fibrosis in vivo. *Endocrinology* **2004**, *145*, 4125-4133, 10.1210/en.2004-0209
- (34) Teerlink, J. R.; Metra, M.; Felker, G. M.; Ponikowski, P.; Voors, A. A. *et al.* Relaxin for the treatment of patients with acute heart failure (Pre-RELAX-AHF): a multicentre, randomised, placebo-controlled, parallel-group, dose-finding phase IIb study. *Lancet* **2009**, *373*, 1429-1439, 10.1016/S0140-6736(09)60622-X
- (35) Arroyo, J. I.; Hoffmann, F. G.; Opazo, J. C. Evolution of the relaxin/insulin-like gene family in anthropoid primates. *Genome Biol Evol* **2014**, *6*, 491-499, 10.1093/gbe/evu023
- (36) Garibay-Tupas, J. L.; Bao, S.; Kim, M. T.; Tashima, L. S.; Bryant-Greenwood, G. D. Isolation and analysis of the 3'-untranslated regions of the human relaxin H1 and H2 genes. *J Mol Endocrinol* **2000**, *24*, 241-252, 10.1677/jme.0.0240241
- (37) Tevz, G.; McGrath, S.; Demeter, R.; Magrini, V.; Jeet, V. *et al.* Identification of a novel fusion transcript between human relaxin-1 (RLN1) and human relaxin-2 (RLN2) in prostate cancer. *Mol Cell Endocrinol* **2016**, *420*, 159-168, 10.1016/j.mce.2015.10.011
- (38) Carrell, D. T.; Peterson, C. M.; Urry, R. L. The binding of recombinant human relaxin to human spermatozoa. *Endocr Res* **1995**, *21*, 697-707, 10.1080/07435809509030484
- (39) Feng, S.; Agoulnik, I. U.; Bogatcheva, N. V.; Kamat, A. A.; Kwabi-Addo, B. *et al.* Relaxin promotes prostate cancer progression. *Clin Cancer Res* **2007**, *13*, 1695-1702, 10.1158/1078-0432.CCR-06-2492

- (40) Colon, J. M.; Santoro, N.; Goldsmith, L. T.; Whitcomb, R.; Musket, D. *et al.* Relaxin secretion into human semen independent of gonadotropin stimulation. *Biol Reprod* **1994**, *50*, 187-192, 10.1095/biolreprod50.1.187
- (41) Anumba, D. O.; El Gelany, S.; Elliott, S. L.; Li, T. C. Serum relaxin levels are reduced in pregnant women with a history of recurrent miscarriage, and correlate with maternal uterine artery Doppler indices in first trimester. *Eur J Obstet Gynecol Reprod Biol* **2009**, *147*, 41-45, 10.1016/j.ejogrb.2009.07.008
- (42) Kelly, A. J.; Kavanagh, J.; Thomas, J. Relaxin for cervical ripening and induction of labour. *Cochrane Database Syst Rev* **2001**, *2001*, CD003103, 10.1002/14651858.CD003103
- (43) Gkrozou, F.; Pappa, C.; Tsonis, O.; Dimitriou, E.; Paschopoulos, M. Relaxin as a potential diagnostic biomarker for ovarian cancer- A prospective study. *Eur J Obstet Gynecol Reprod Biol* **2021**, *260*, 99-104, 10.1016/j.ejogrb.2021.03.008
- (44) Garcia, A.; Skurnick, J. H.; Goldsmith, L. T.; Emmi, A.; Weiss, G. Human chorionic gonadotropin and relaxin concentrations in early ectopic and normal pregnancies. *Obstet Gynecol* **1990**, *75*, 779-783
- (45) Szlachter, B. N.; Quagliarello, J.; Jewelewicz, R.; Osathanondh, R.; Spellacy, W. N. *et al.* Relaxin in normal and pathogenic pregnancies. *Obstet Gynecol* **1982**, *59*, 167-170
- (46) Witt, B. R.; Wolf, G. C.; Wainwright, C. J.; Johnston, P. D.; Thorneycroft, I. H. Relaxin, CA-125, progesterone, estradiol, Schwangerschaft protein, and human chorionic gonadotropin as predictors of outcome in threatened and nonthreatened pregnancies. *Fertil Steril* **1990**, *53*, 1029-1036
- (47) Post Uiterweer, E. D.; Koster, M. P. H.; Jeyabalan, A.; Kuc, S.; Siljee, J. E. *et al.* Circulating pregnancy hormone relaxin as a first trimester biomarker for preeclampsia. *Pregnancy Hypertens* **2020**, *22*, 47-53, 10.1016/j.preghy.2020.07.008
- (48) Ghattas, M. H.; Mehanna, E. T.; Mesbah, N. M.; Abo-Elmatty, D. M. Relaxin-3 is associated with metabolic syndrome and its component traits in women. *Clin Biochem* **2013**, *46*, 45-48, 10.1016/j.clinbiochem.2012.09.018
- (49) Zhang, X.; Zhu, M.; Zhao, M.; Chen, W.; Fu, Y. *et al.* The plasma levels of relaxin-2 and relaxin-3 in patients with diabetes. *Clin Biochem* **2013**, *46*, 1713-1716, 10.1016/j.clinbiochem.2013.08.007
- (50) Schiza, C.; Korbakis, D.; Jarvi, K.; Diamandis, E. P.; Drabovich, A. P. Identification of TEX101-associated Proteins Through Proteomic Measurement of Human Spermatozoa Homozygous for the Missense Variant rs35033974. *Mol Cell Proteomics* **2019**, *18*, 338-351, 10.1074/mcp.RA118.001170
- (51) Zhang, J.; Kanoatov, M.; Jarvi, K.; Gauthier-Fisher, A.; Moskovtsev, S. I. *et al.* Germ cell-specific proteins AKAP4 and ASPX facilitate identification of rare spermatozoa in non-obstructive azoospermia. *Mol Cell Proteomics* **2023**, *22*, 100556, 10.1016/j.mcpro.2023.100556
- (52) Drabovich, A. P.; Pavlou, M. P.; Batruch, I.; Diamandis, E. P.: Chapter 2 - Proteomic and mass spectrometry technologies for biomarker discovery. In *Proteomic and Metabolomic Approaches to Biomarker Discovery*; Issaq, H. J., Veenstra, T. D., Eds.; Academic Press (Elsevier): Waltham, MA, 2013; pp 17-37.
- (53) Saraon, P.; Musrap, N.; Cretu, D.; Karagiannis, G. S.; Batruch, I. *et al.* Proteomic profiling of androgen-independent prostate cancer cell lines reveals a role for protein S during the development of high grade and castration-resistant prostate cancer. *J Biol Chem* **2012**, *287*, 34019-34031, 10.1074/jbc.M112.384438

- (54) Saraon, P.; Cretu, D.; Musrap, N.; Karagiannis, G. S.; Batruch, I. *et al.* Quantitative proteomics reveals that enzymes of the ketogenic pathway are associated with prostate cancer progression. *Mol Cell Proteomics* **2013**, *12*, 1589-1601, 10.1074/mcp.M112.023887
- (55) Prakash, A.; Rezai, T.; Krastins, B.; Sarracino, D.; Athanas, M. *et al.* Interlaboratory reproducibility of selective reaction monitoring assays using multiple upfront analyte enrichment strategies. *J Proteome Res* **2012**, *11*, 3986-3995, 10.1021/pr300014s
- (56) Prakash, A.; Rezai, T.; Krastins, B.; Sarracino, D.; Athanas, M. *et al.* Platform for establishing interlaboratory reproducibility of selected reaction monitoring-based mass spectrometry peptide assays. *J Proteome Res* **2010**, *9*, 6678-6688, 10.1021/pr100821m
- (57) Martinez-Morillo, E.; Nielsen, H. M.; Batruch, I.; Drabovich, A. P.; Begcevic, I. *et al.* Assessment of peptide chemical modifications on the development of an accurate and precise multiplex selected reaction monitoring assay for apolipoprotein e isoforms. *J Proteome Res* **2014**, *13*, 1077-1087, 10.1021/pr401060x
- (58) Martinez-Morillo, E.; Cho, C. K.; Drabovich, A. P.; Shaw, J. L.; Soosaipillai, A. *et al.* Development of a multiplex selected reaction monitoring assay for quantification of biochemical markers of down syndrome in amniotic fluid samples. *J Proteome Res* **2012**, *11*, 3880-3887, 10.1021/pr300355a
- (59) Konvalinka, A.; Zhou, J.; Dimitromanolakis, A.; Drabovich, A. P.; Fang, F. *et al.* Determination of an angiotensin II-regulated proteome in primary human kidney cells by stable isotope labeling of amino acids in cell culture (SILAC). *J Biol Chem* **2013**, *288*, 24834-24847, 10.1074/jbc.M113.485326
- (60) Konvalinka, A.; Batruch, I.; Tokar, T.; Dimitromanolakis, A.; Reid, S. *et al.* Quantification of angiotensin II-regulated proteins in urine of patients with polycystic and other chronic kidney diseases by selected reaction monitoring. *Clin Proteomics* **2016**, *13*, 16, 10.1186/s12014-016-9117-x
- (61) Drabovich, A. P.; Diamandis, E. P. Combinatorial peptide libraries facilitate development of multiple reaction monitoring assays for low-abundance proteins. *J Proteome Res* **2010**, *9*, 1236-1245, 10.1021/pr900729g
- (62) Begcevic, I.; Brinc, D.; Dukic, L.; Simundic, A. M.; Zavoreo, I. *et al.* Targeted mass spectrometry-based assays for relative quantification of 30 brain-related proteins and their clinical applications. *J Proteome Res* **2018**, *17*, 2282-2292, 10.1021/acs.jproteome.7b00768
- (63) Begcevic, I.; Brinc, D.; Drabovich, A. P.; Batruch, I.; Diamandis, E. P. Identification of brain-enriched proteins in the cerebrospinal fluid proteome by LC-MS/MS profiling and mining of the Human Protein Atlas. *Clin Proteomics* **2016**, *13*, 11, 10.1186/s12014-016-9111-3
- (64) Jarvi, K.; Schlegel, P.; Schiza, C.; Drabovich, A.; Lau, S. *et al.* Semen biomarker TEX101 predicts sperm retrieval success for men with testicular failure. *F1000Research* **2021**, *10*, 569, 10.12688/f1000research.53338.1
- (65) Bieniek, J. M.; Drabovich, A. P.; Lo, K. C. Seminal biomarkers for the evaluation of male infertility. *Asian J Andrology* **2016**, *18*, 426-433, 10.4103/1008-682X.175781
- (66) Schiza, C. G.; Jarv, K.; Diamandis, E. P.; Drabovich, A. P. An Emerging Role of TEX101 Protein as a Male Infertility Biomarker. *J Int Fed Clin Chem Lab Med* **2014**, *25*, 9-26
- (67) Drabovich, A. P.; Dimitromanolakis, A.; Saraon, P.; Soosaipillai, A.; Batruch, I. *et al.* Differential diagnosis of azoospermia with proteomic biomarkers ECM1 and TEX101 quantified in seminal plasma. *Sci Transl Med* **2013**, *5*, 212ra160, 10.1126/scitranslmed.3006260

- (68) Drabovich, A. P.; Jarvi, K.; Diamandis, E. P. Verification of male infertility biomarkers in seminal plasma by multiplex selected reaction monitoring assay. *Mol Cell Proteomics* **2011**, *10*, M110 004127, 10.1074/mcp.M110.004127
- (69) Cho, C. K.; Drabovich, A. P.; Batruch, I.; Diamandis, E. P. Verification of a biomarker discovery approach for detection of Down syndrome in amniotic fluid via multiplex selected reaction monitoring (SRM) assay. *J Proteomics* **2011**, *74*, 2052-2059, 10.1016/j.jprot.2011.05.025
- (70) Korbakis, D.; Schiza, C.; Brinc, D.; Soosaipillai, A.; Karakosta, T. D. *et al.* Preclinical evaluation of a TEX101 protein ELISA test for the differential diagnosis of male infertility. *BMC Med* **2017**, *15*, 60, 10.1186/s12916-017-0817-5
- (71) Jarvi, K. D., E. P.; Drabovich, A. Markers of the male urogenital tract. *US Patent 9,040,464* **2015**
- (72) Rais, Y.; Fu, Z.; Drabovich, A. P. Mass spectrometry-based proteomics in basic and translational research of SARS-CoV-2 coronavirus and its emerging mutants. *Clin Proteomics* **2021**, *18*, 19, 10.1186/s12014-021-09325-x
- (73) Schiza, C.; Korbakis, D.; Panteleli, E.; Jarvi, K.; Drabovich, A. P. *et al.* Discovery of a Human Testis-specific Protein Complex TEX101-DPEP3 and Selection of Its Disrupting Antibodies. *Mol Cell Proteomics* **2018**, *17*, 2480-2495, 10.1074/mcp.RA118.000749
- (74) Saraon, P.; Drabovich, A. P.; Jarvi, K. A.; Diamandis, E. P. Mechanisms of Androgen-Independent Prostate Cancer. *J Int Fed Clin Chem Lab Med* **2014**, *25*, 42-54
- (75) Drabovich, A. P.; Pavlou, M. P.; Dimitromanolakis, A.; Diamandis, E. P. Quantitative analysis of energy metabolic pathways in MCF-7 breast cancer cells by selected reaction monitoring assay. *Mol Cell Proteomics* **2012**, *11*, 422-434, 10.1074/mcp.M111.015214
- (76) Dimitrakopoulos, L.; Prassas, I.; Diamandis, E. P.; Nesvizhskii, A.; Kislinger, T. *et al.* Proteogenomics: Opportunities and Caveats. *Clin Chem* **2016**, *62*, 551-557, 10.1373/clinchem.2015.247858
- (77) Dara, D.; Drabovich, A. P. Assessment of risks, implications, and opportunities of waterborne neurotoxic pesticides. *J Environ Sci* **2023**, *125*, 735-741, 10.1016/j.jes.2022.03.033
- (78) Rais, Y.; Drabovich, A. P. Gasoline-derived methyl tert-butyl ether as a potential obesogen linked to metabolic syndrome. *J Environ Sci* **2020**, *91*, 209-211, 10.1016/j.jes.2020.02.008
- (79) Drabovich, A. P.; Pavlou, M. P.; Schiza, C.; Diamandis, E. P. Dynamics of protein expression reveals primary targets and secondary messengers of estrogen receptor alpha signaling in MCF-7 breast cancer cells. *Mol Cell Proteomics* **2016**, *15*, 2093-2107, 10.1074/mcp.M115.057257
- (80) Cho, C. K.; Drabovich, A. P.; Karagiannis, G. S.; Martinez-Morillo, E.; Dason, S. *et al.* Quantitative proteomic analysis of amniocytes reveals potentially dysregulated molecular networks in Down syndrome. *Clin Proteomics* **2013**, *10*, 2, 10.1186/1559-0275-10-2doi
- (81) Fu, Z.; Rais, Y.; Dara, D.; Jackson, D.; Drabovich, A. P. Rational Design and Development of SARS-CoV-2 Serological Diagnostics by Immunoprecipitation-Targeted Proteomics. *Anal Chem* **2022**, *94*, 12990-12999, 10.1021/acs.analchem.2c01325
- (82) Walter, J.; Eludin, Z.; Drabovich, A. P. Redefining serological diagnostics with immunoaffinity proteomics. *Clin Proteomics* **2023**, *20*, 42, 10.1186/s12014-023-09431-y
- (83) Korbakis, D.; Brinc, D.; Schiza, C.; Soosaipillai, A.; Jarvi, K. *et al.* Immunocapture-Selected Reaction Monitoring Screening Facilitates the Development of ELISA for the Measurement of Native TEX101 in Biological Fluids. *Mol Cell Proteomics* **2015**, *14*, 1517-1526, 10.1074/mcp.M114.047571



- (84) Drabovich, A. P.; Martínez-Morillo, E.; Diamandis, E. P. Toward an integrated pipeline for protein biomarker development. *Biochim Biophys Acta* **2015**, *1854*, 677-686, 10.1016/j.bbapap.2014.09.006
- (85) Drabovich, A. P.; Martínez-Morillo, E.; Diamandis, E. P.: Chapter 3 - Protein Biomarker Discovery: An Integrated Concept. In *Proteomics for Biological Discovery*; 2nd Edition ed.; Veenstra, T. D., Yates III, J. R., Eds.; Wiley-Blackwell: Hoboken, NJ 2019, 2019; pp 63-88.
- (86) Borrebaeck, C. A. Precision diagnostics: moving towards protein biomarker signatures of clinical utility in cancer. *Nat Rev Cancer* **2017**, *17*, 199-204, 10.1038/nrc.2016.153
- (87) Geoghegan, K. F.; Hoth, L. R.; Tan, D. H.; Borzilleri, K. A.; Withka, J. M. *et al.* Cyclization of N-terminal S-carbamoylmethylcysteine causing loss of 17 Da from peptides and extra peaks in peptide maps. *J Proteome Res* **2002**, *1*, 181-187, 10.1021/pr025503d
- (88) Choi, M.; Carver, J.; Chiva, C.; Tzouros, M.; Huang, T. *et al.* MassIVE.quant: a community resource of quantitative mass spectrometry-based proteomics datasets. *Nat Methods* **2020**, *17*, 981-984, 10.1038/s41592-020-0955-0
- (89) Nair, V. B.; Samuel, C. S.; Separovic, F.; Hossain, M. A.; Wade, J. D. Human relaxin-2: historical perspectives and role in cancer biology. *Amino Acids* **2012**, *43*, 1131-1140, 10.1007/s00726-012-1375-y
- (90) Malone, L.; Opazo, J. C.; Ryan, P. L.; Hoffmann, F. G. Progressive erosion of the Relaxin1 gene in bovids. *Gen Comp Endocrinol* **2017**, *252*, 12-17, 10.1016/j.yggen.2017.07.011
- (91) Dragoo, J. L.; Castillo, T. N.; Korotkova, T. A.; Kennedy, A. C.; Kim, H. J. *et al.* Trends in serum relaxin concentration among elite collegiate female athletes. *Int J Womens Health* **2011**, *3*, 19-24, 10.2147/IJWH.S14188
- (92) Liu, Y. D.; Goetze, A. M.; Bass, R. B.; Flynn, G. C. N-terminal glutamate to pyroglutamate conversion in vivo for human IgG2 antibodies. *J Biol Chem* **2011**, *286*, 11211-11217, 10.1074/jbc.M110.185041
- (93) Weize, T.; Drabovich, A. P. The proteomic toolbox for identification, quantification, and characterization of polyclonal antibodies. *bioRxiv* **2023**, 10.1101/2023.1110.1127.564451, <https://doi.org/10.1101/2023.10.27.564451>
- (94) Huang, K. F.; Liu, Y. L.; Cheng, W. J.; Ko, T. P.; Wang, A. H. Crystal structures of human glutaminyl cyclase, an enzyme responsible for protein N-terminal pyroglutamate formation. *Proc Natl Acad Sci U S A* **2005**, *102*, 13117-13122, 10.1073/pnas.0504184102
- (95) Burston, H. E.; Kent, O. A.; Communal, L.; Udaskin, M. L.; Sun, R. X. *et al.* Inhibition of relaxin autocrine signaling confers therapeutic vulnerability in ovarian cancer. *J Clin Invest* **2021**, *131*, 10.1172/JCI142677
- (96) Samuel, C. S.; Zhao, C.; Bathgate, R. A.; Du, X. J.; Summers, R. J. *et al.* The relaxin gene-knockout mouse: a model of progressive fibrosis. *Ann N Y Acad Sci* **2005**, *1041*, 173-181, 10.1196/annals.1282.025
- (97) Devarakonda, T.; Valle Raleigh, J.; Mauro, A. G.; Lambert, J. M.; Cowart, L. A. *et al.* Chronic treatment with serelaxin mitigates adverse remodeling in a murine model of ischemic heart failure and modulates bioactive sphingolipid signaling. *Sci Rep* **2022**, *12*, 8897, 10.1038/s41598-022-12930-x
